# Supplementary material
Source: MDPI journal article supplement (https://www.mdpi.com/2073-4433/10/2/59)

# Summertime Aerosol Over the West of Ireland Dominated by Secondary Aerosol During Long-Range Transport

Chunshui Lin <sup>1,2,3</sup>, Darius Ceburnis <sup>1</sup>, Ru-Jin Huang <sup>1,2,3,\*</sup>, Francesco Canonaco <sup>4</sup>, André Stephan Henry Prévôt <sup>4</sup>, Colin O'Dowd <sup>1,\*</sup> and Jurgita Ovadnevaite <sup>1</sup>

<sup>1</sup> School of Physics, Ryan Institute's Centre for Climate and & Pollution Studies, and Marine Renewable Energy Ireland, National University of Ireland Galway, University Road, Galway H91 CF50, Ireland; c.lin7@nuigalway.ie (C.L.); darius.ceburnis@nuigalway.ie (D.C.); jurgita.ovadnevaite@nuigalway.ie (J.O.)

<sup>2</sup> State Key Laboratory of Loess and Quaternary Geology and Key Laboratory of Aerosol Chemistry and Physics, Institute of Earth Environment, Chinese Academy of Sciences, Xi'an 710061, China;

<sup>3</sup> Center for Excellence in Quaternary Science and Global Change, Institute of Earth Environment, Chinese Academy of Sciences, Xi'an, 710061, China.

<sup>4</sup> Laboratory of Atmospheric Chemistry, Paul Scherrer Institute (PSI), 5232 Villigen, Switzerland; francesco.canonaco@psi.ch (F.C.); andre.prevot@psi.ch (A.S.H.P.)

\* Correspondence: rujin.huang@ieecas.cn (R.J.H.); colin.odowd@nuigalway.ie (C.O.D.); Tel.: +86-(0)29-6233-6275 (R.J.H.); Tel.: +353-91-49-3306 (C.O.D.)

## OA Source Apportionment:

Free PMF identified two factors: peat and OOA. As shown in Figure S1, there is a large drop in the  $Q/Q_{exp}$  value from 1 to 2 factors, and  $Q/Q_{exp}$  is 0.81 at 2 factors. However, no strong change in  $Q/Q_{exp}$  was observed by further increasing the number of factors. Figure S2 shows that 3-factor or 4-factor solutions led to the splitting of factors and no more meaningful factors could be identified.

In the 2-factor solution, Factor 1 was identified as an OOA-like factor because it correlated well,  $R = 0.94$ , with the reference OOA profile from Ng et al, [2] (Table S1). OOA-like factor contains a typically high signal at mass to charge ratio ( $m/z$ ) 44, arising mainly from  $CO_2^+$  and associated with aerosol aging or secondary formation. Factor 2 was identified as a peat-like factor that correlated well ( $R = 0.91$ ) with the reference peat profile (Table S1); its correlation with other reference factors was poorer (e.g.,  $r = 0.75$ – $0.77$  with HOA) [3]. Figure S3 shows the time series of the OOA-like and peat-like factors. The time series of OOA-like factor correlated well with sulfate ( $R = 0.83$ ), indicating a secondary nature. Peat-like factor correlated well with the time series of  $m/z$  60 ( $R = 0.81$ ), a marker of biomass burning emission. The diurnal cycle of OOA shows a flat pattern at a relatively high concentration level ( $\sim 1.2 \mu g m^{-3}$ , Figure S4a), indicating regional transport was the major source. On average, OOA contributed 85% of the total OA mass. In contrast, peat-like factor remained at a very low concentration level ( $< 0.2 \mu g m^{-3}$ ) during the day, but it rose to  $\sim 0.5 \mu g m^{-3}$  at  $\sim 21:00$ .

However, the profile of peat-like factor in the free PMF 2-factor solution (Figure S2a) contained no  $m/z$  44 fraction and higher than expected  $m/z$  29 fraction when compared to the reference peat profile [3], compromising their attributions. To evaluate the contribution of peat with different degree of variation (0% to 90%, Figure S5) from the reference peat profile,  $a$  value approach within ME-2 was applied [3]. Over the range of  $a$  value (0.0–0.9), the mean value of the relative contribution for peat was  $16\% \pm 0.9\%$  ( $\pm$  standard deviation), ranging from 15% to 18% (Figure S5). OOA factor contributed  $84\% \pm 0.9\%$ , ranging from 82% to 85%. The small variation between solutions with different  $a$  values suggests a relatively low bilinear model uncertainty. In the main text, the solution with  $a$  value of 0.1 is presented.

Figure S6 shows the residual of the ME-2 analysis. As expected,  $m/z$  29 has a relatively higher residual. No profile structure nor diurnal patterns that could link to other sources could be identified, indicating the current ME-2 solution represented the data very well.

**Table S1.** The correlation coefficient between the 2-factor solution factor profiles in free PMF and the reference factor profile from literature [1-3].

| R       | OOA_avg<br>[1] | OOAH_avg | BBOA_avg | HOA_avg | HOA_Paris<br>[2] | COA_Paris | Wood | Smoky<br>Coal | Peat<br>[3] |
|---------|----------------|----------|----------|---------|------------------|-----------|------|---------------|-------------|
| Factor1 | 0.94           | 0.53     | 0.42     | 0.12    | 0.12             | 0.23      | 0.34 | 0.16          | 0.26        |
| Factor2 | 0.33           | 0.75     | 0.87     | 0.75    | 0.77             | 0.86      | 0.77 | 0.86          | 0.91        |

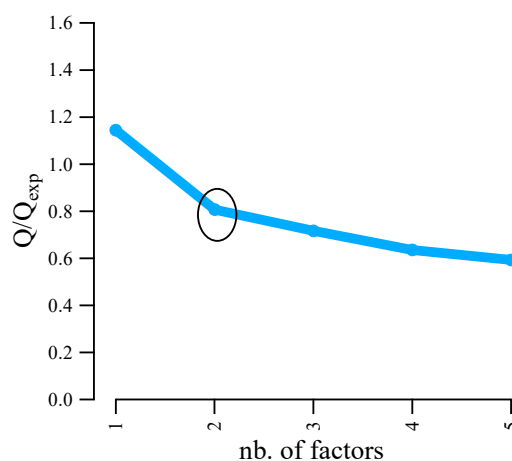

**Figure S1.**  $Q/Q_{exp}$  as a function of number (nb.) of factors.

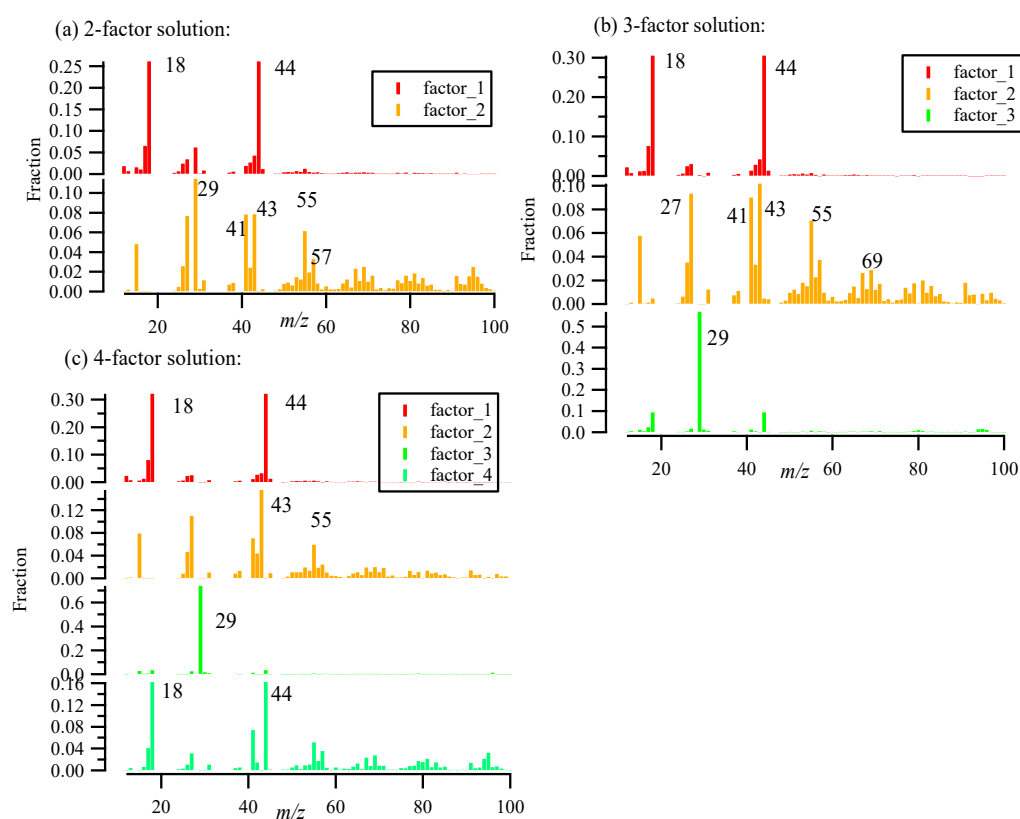

**Figure 2.** The mass spectra of the (a) 2-factor; (b) 3-factor; and (c) 4-factor solutions from the free PMF analysis.

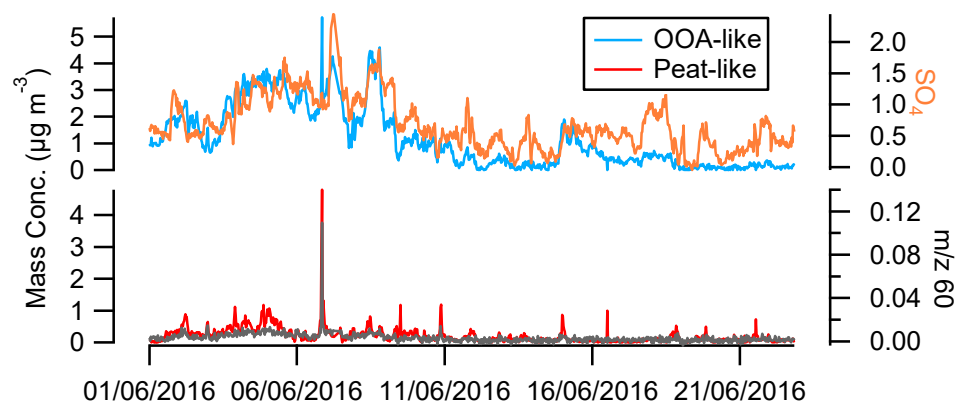

**Figure 3.** The time series of OOA-like and peat-like factor (left axis) from the free PMF series. Also shown are the time series of sulfate and m/z 60 (right axis).

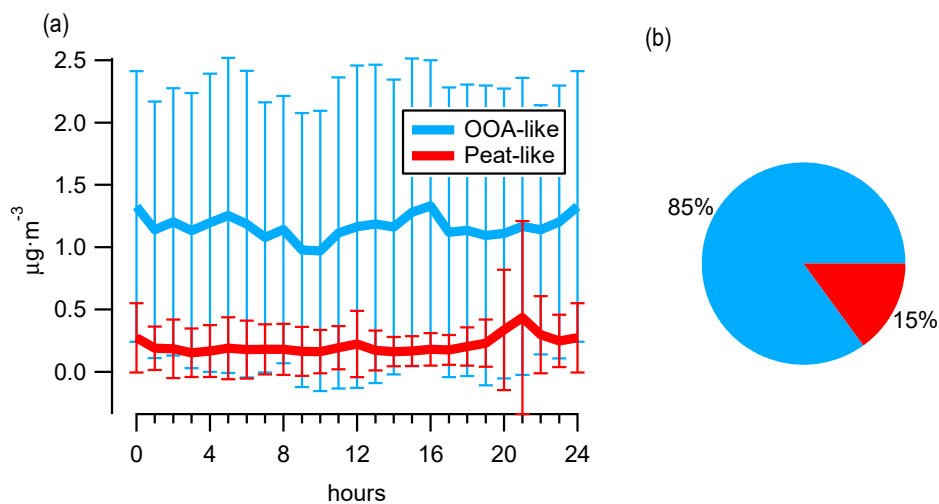

**Figure 4.** The diurnal cycle (a) and the relative contribution of the peat and OOA to the total OA (b). The error bar stands for one standard deviation.

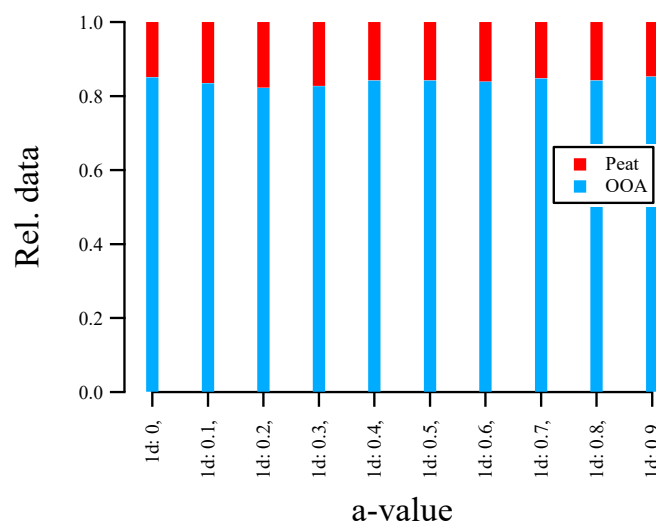

**Figure 5.** Relative contribution of the resolved peat and OOA as a function of a values from 0 to 0.9 with ME-2.

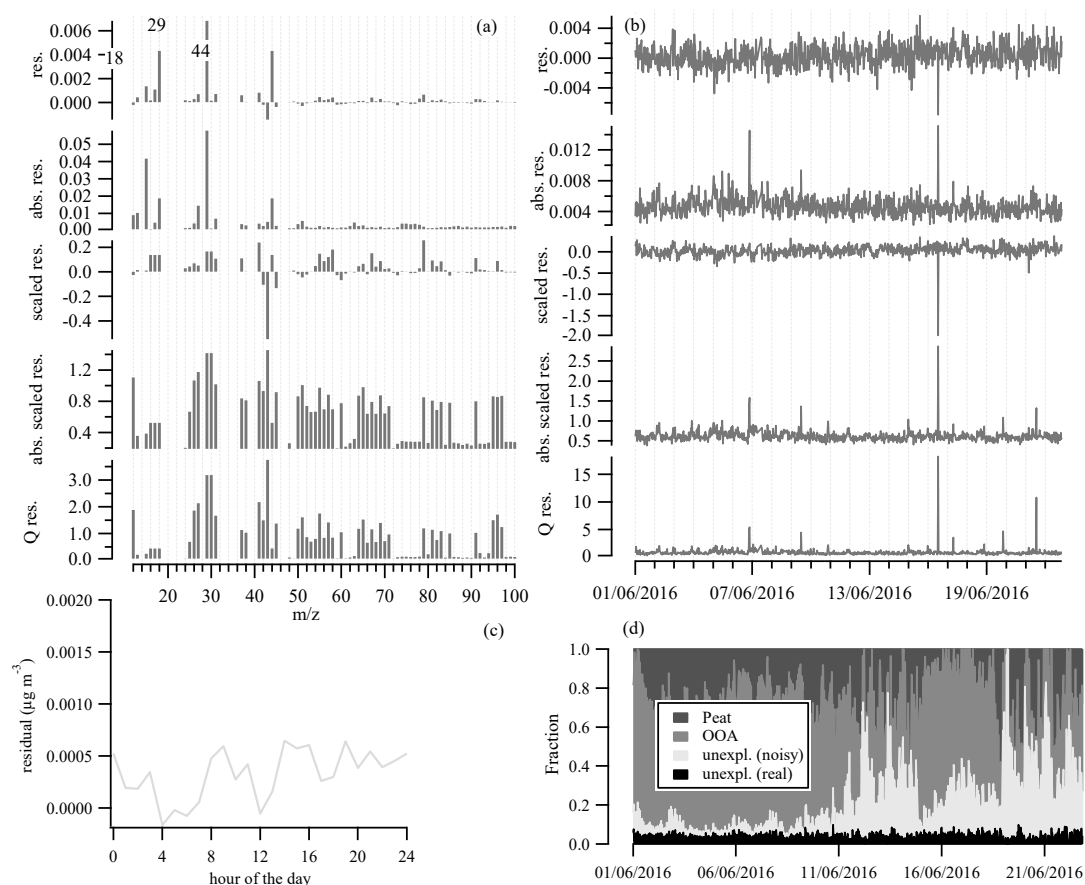

**Figure 6.** Residual of  $m/z$  (a), time series (b), diurnal of residual (c), and time series of the fraction of peat, OOA, and residue (d) of the ME-2 2-factor solution.

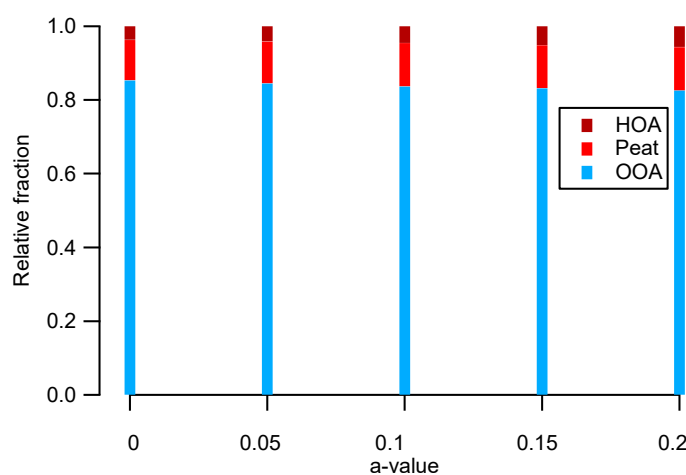

**Figure 7.** Relative contribution of HOA, peat, and OOA as a function of  $a$  value from 0 to 0.2. HOA comprised a small fraction of total OA (4–6%) over the range of  $a$  values (0–0.2). Peat contributed 11%–12% of the total OA, while OOA contributed 82%–85% of the total OA.

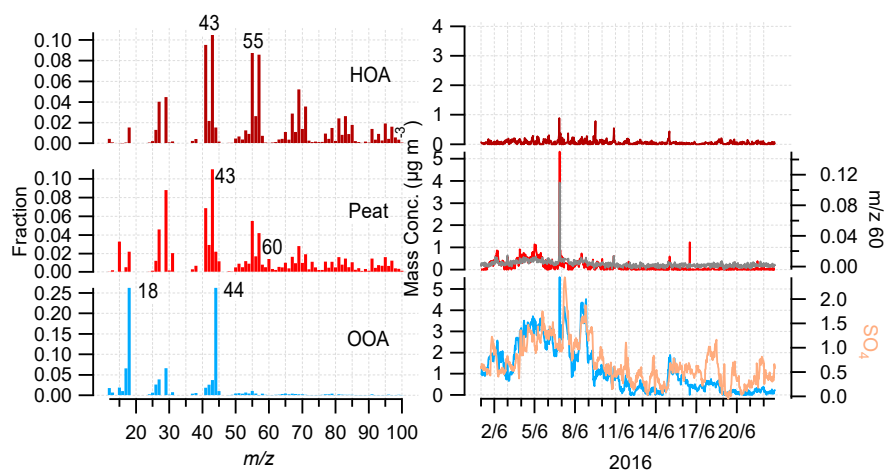

**Figure 8.** Profile (at  $a$  value of 0.1) and time series of hydrocarbon-like OA (HOA), peat, and OOA (oxygenated organic aerosol). Also shown are the time series of  $m/z$  60 and sulfate.

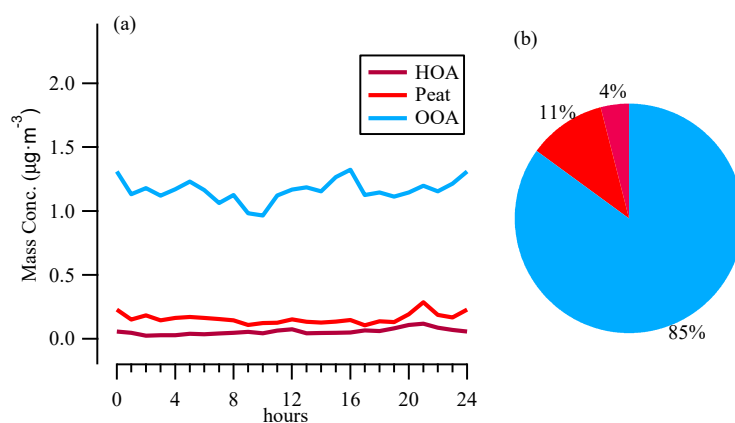

**Figure 9.** The diurnal cycle (a) and the relative contribution of the HOA, peat, and OOA to the total OA (b) at  $a$  value of 0.1.

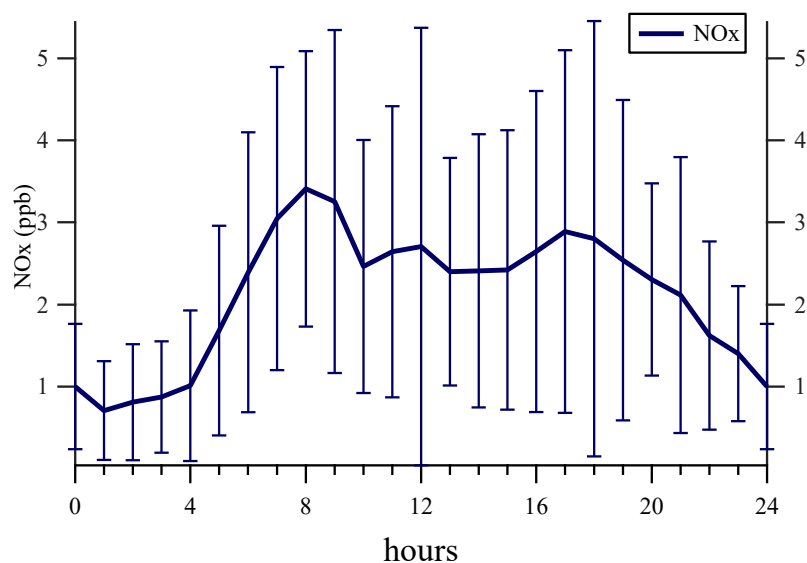

**Figure 10.** Diurnal cycle of  $\text{NO}_x$  (in ppb).  $\text{NO}_x$  was monitored by a collocated chemiluminescent analyzer (API, model 200A). The error bar is one standard deviation.

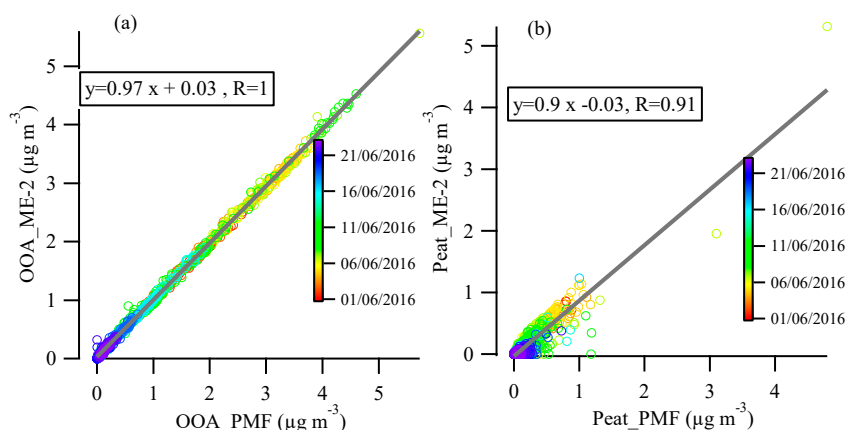

**Figure 11.** Linear correlation between the time series of (a) OOA from the ME-2 3-factor solution ( $a$  value = 0.1) versus OOA from the free PMF 2-factor solution and (b) peat factor from the ME-2 3-factor solution ( $a$  value = 0.1) versus OOA from the free PMF 2-factor solution, color-coded by date. The inset shows the correlation coefficient and slope.

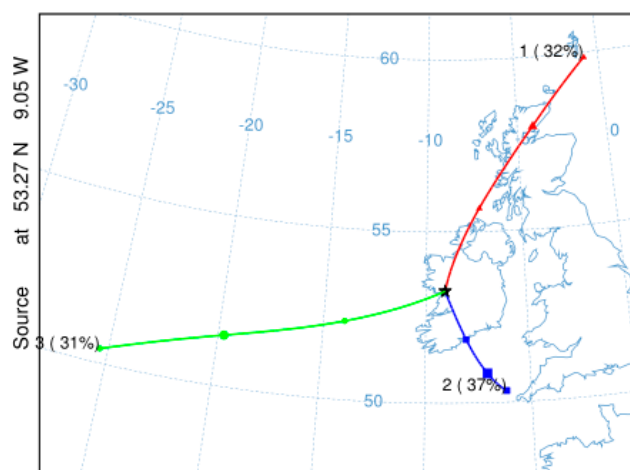

**Figure 12.** Classification of air mass trajectories with occurrence rates: 37% for southeasterly (SE) continental; 32% for northeasterly (NE) continental; and 31% for marine.

## References

1. Ng, N. L.; Canagaratna, M. R.; Jimenez, J. L.; Zhang, Q.; Ulbrich, I. M.; Worsnop, D. R., Real-Time Methods for Estimating Organic Component Mass Concentrations from Aerosol Mass Spectrometer Data. *Environ. Sci. Technol.* **2011**, *45*, 910–916.
2. Crippa, M.; Decarlo, P.F.; Slowik, J.G.; Mohr, C.; Heringa, M.F.; Chirico, R.; Poulain, L.; Freutel, F.; Sciare, J.; Cozic, J.; et al. Wintertime aerosol chemical composition and source apportionment of the organic fraction in the metropolitan area of Paris. *Atmos. Chem. Phys.* **2013**, *13*, 961–981.
3. Lin, C.; Ceburnis, D.; Hellebust, S.; Buckley, P.; Wenger, J.; Canonaco, F.; Prévôt, A. S. H.; Huang, R.-J.; O'Dowd, C.; Ovadnevaite, J., Characterization of Primary Organic Aerosol from Domestic Wood, Peat, and Coal Burning in Ireland. *Environ. Sci. Technol.* **2017**, *51*, 10624–10632.

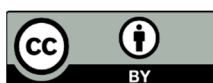

Supplement: s1 [file s1]
